# Supplementary material for: Thioacetamide-derived nitrogen and sulfur co-doped carbon nanoparticles used for label-free detection of copper(ii) ions and bioimaging applications
Source: Royal Society of Chemistry journal article supplement (doi:10.1039/c7nj02901b), 2017-01-01
Supplement: c7nj02901b1.pdf [file c7nj02901b1.pdf]

*Supporting Information for*

**Thioacetamide Derived Nitrogen and Sulphur Co-doped Carbon  
Nanoparticles Used for Label-free Detection of Copper (II) Ion and  
Bioimaging Application**

Hari Krishna Sadhanala, Ananya Maddegalla, and Karuna Kar Nanda\*

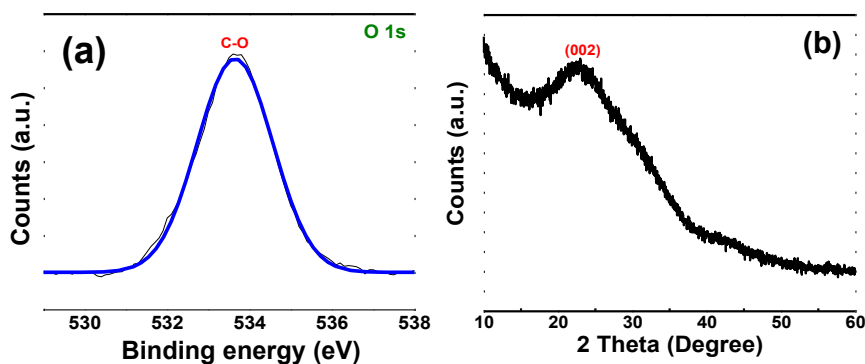

**Figure S1.** (a) High resolution O 1s spectrum, and (b) XRD pattern of NS-CNPs

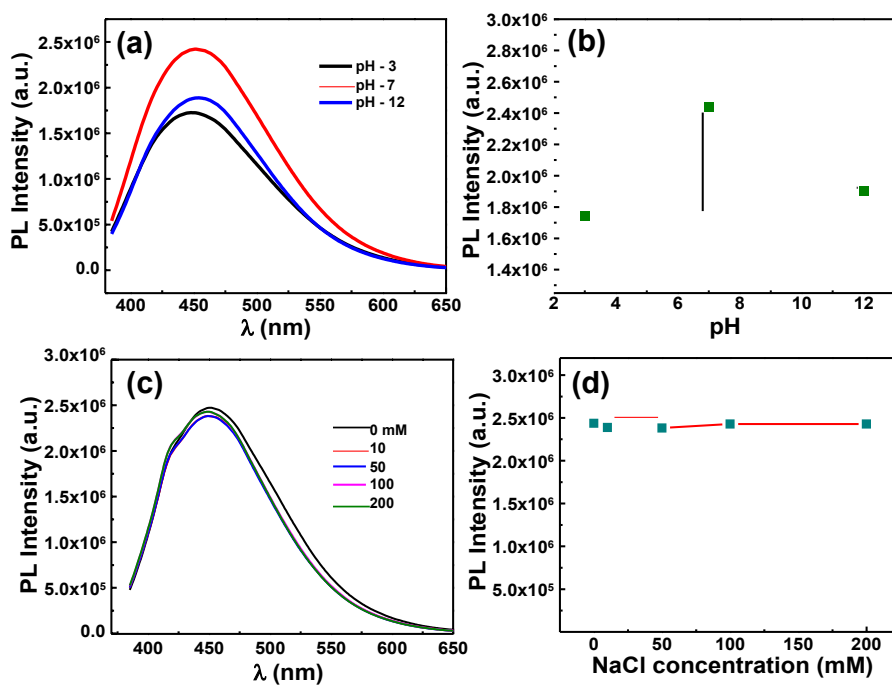

**Figure S2.** (a, c) PL spectra of NS-CNPs at different pH and NaCl concentrations, (b, d) PL intensity as a function of pH and NaCl concentration.

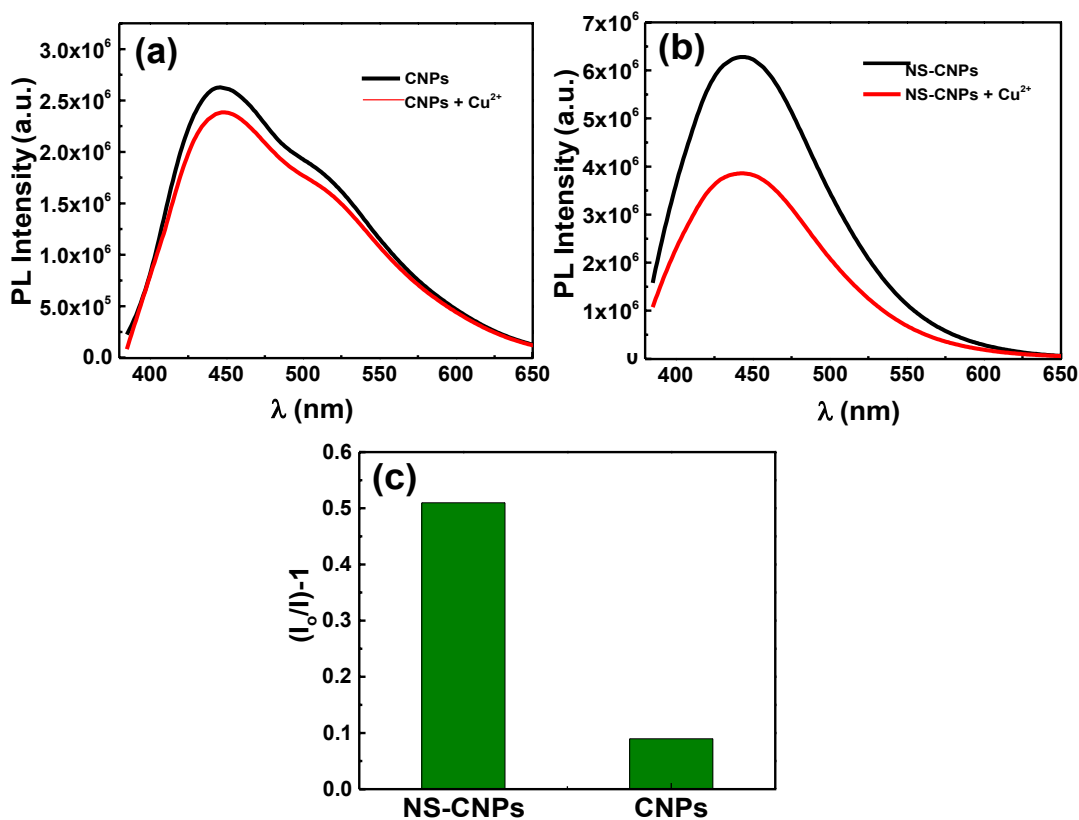

**Figure S3.** (a, b) PL spectra of CNPs and NS-CNPs in the presence of Cu<sup>2+</sup> ion (200 μM), and (c) Selectivity of CNPs and NS-CNPs towards Cu<sup>2+</sup> ion (200 μM) with 365 nm excitation.

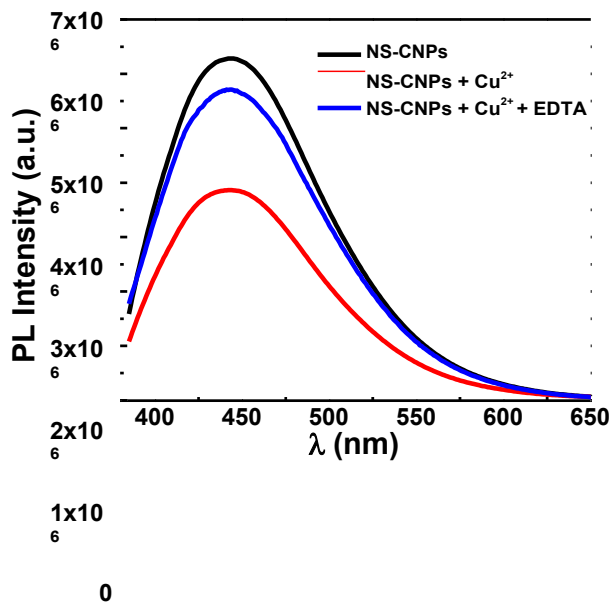

**Figure S4.** Reusability of NS-CNPs in the presence of Cu<sup>2+</sup> ion (200 μM) with 365 nm excitation.

**Table S1**

| <b>Ref No.</b>    | <b>Materials</b>                         | <b>LOD</b>          |
|-------------------|------------------------------------------|---------------------|
| 1                 | ZnS QDs                                  | 7.1 $\mu\text{M}$   |
| 2                 | Carbon dots                              | 4.8 $\mu\text{M}$   |
| 3                 | DTDC- CdSe/CdS QDs                       | 4.7 $\mu\text{M}$   |
| 4                 | Cys-CdS QDs                              | 1.5 $\mu\text{M}$   |
| 5                 | Fe <sub>3</sub> O <sub>4</sub> @OCMC@CDs | 0.6 $\mu\text{M}$   |
| 6                 | GQDs                                     | 0.226 $\mu\text{M}$ |
| 7                 | PFR-CdTe Composite                       | 0.160 $\mu\text{M}$ |
| 8                 | BPEI-CQDs                                | 0.115 $\mu\text{M}$ |
| 9                 | CDs/Si NPs                               | 35.2 nM             |
| 10 (In this work) | NS-CNPs                                  | 14 nM               |

**References**

1. M. Koneswaran, R. Narayanaswamy, *Sensors and Actuators B*, 2009, **139**, 104–109.
2. X. Ma, Y. Dong, H. Sun, N. Chen, *Materials Today Chemistry*, 2017, **5**, 1-10.
3. J. Wang, X. Zhou, H. Ma, G. Tao, *Spectrochimica Acta Part A*, 2011, **81**, 178–183.
4. C. Boonmee, T. Noipa, T. Tuntulani, W. Ngeontae, *Spectrochimica Acta Part A: Molecular and Biomolecular Spectroscopy*, 2016, **169**, 161–168.
5. Amit Kumar, A. R. Chowdhuri, D. Laha, S. Chandra, P. Karmakar, and S. K. Sahu, *RSC Adv.*, 2016, **6**, 58979–58987.
6. F. Wang, Z. Gu, W. Lei, W. Wang, X. Xia, Q. Hao, *Sensors and Actuators B*, 2014, **190**, 516– 522.

7. P. Yang, Y. Zhao, Y. Lu, Q-Z. Xu, X-W. Xu, L. Dong, and S-H. Yu, *ACS Nano*, 2011, **5**, 2147–2154.
8. Y. Liu, Y. Zhao, Y. Zhang, *Sensors and Actuators B*, 2014, **196**, 647–652.
9. X. Liu, N. Zhang, T. Bing, and D. Shangguan, *Anal. Chem.*, 2014, **86**, 2289–2296.
